# Supplementary material for: Synthesis and evaluation of analogues of HYNIC as bifunctional chelators for technetium
Source: Royal Society of Chemistry journal article supplement (doi:10.1039/c0dt01608j), 2011-01-01
Supplement: c0dt01608j.pdf [file c0dt01608j.pdf]

## Synthesis and evaluation of analogues of HYNIC as bifunctional chelators for technetium

Levente K Meszaros, Anica Dose, Stefano C G Biagini and Philip J Blower

### Electronic Supplementary Information

#### Content

1. Numbering system for NMR assignments
2. NMR assignments for **4a**
3. Optimising the conditions for synthesising **5**
4.  $^{99}\text{Tc}$  and  $^{99\text{m}}\text{Tc}$  labelling of **5** using the tricine-EDDA co-ligand system

#### 1. Numbering system for NMR assignments

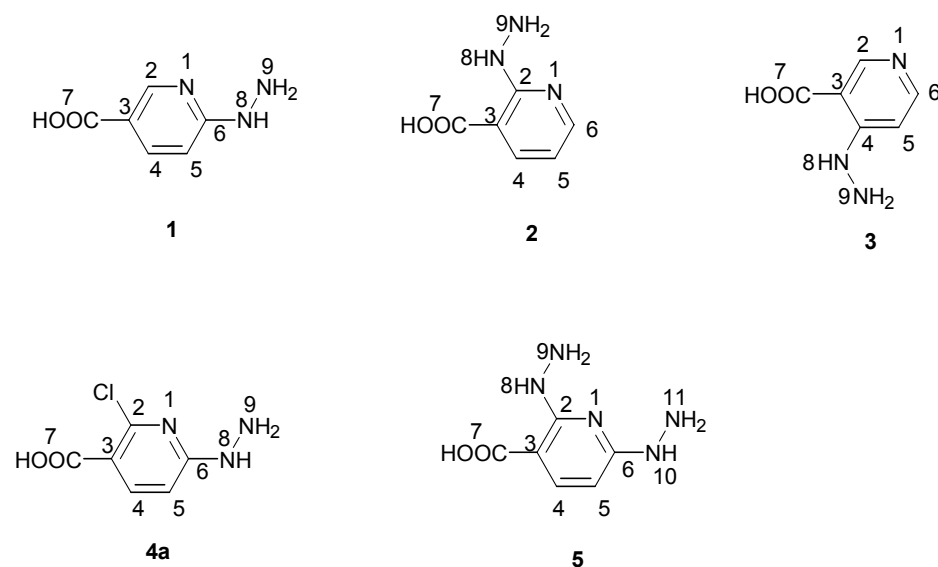

Figure E1: NMR assignments for 1-5

#### 2. NMR assignments for **4a**

In the  $^{13}\text{C}$  NMR spectra, the chemical shift of carbon-3 of **4a** (113.5 ppm), is similar to the carbon-3 chemical shift of compound **1** (115 ppm), indicative of the hydrazine group *para*- to the carboxylic acid group. By contrast, in compound **2** the carboxylic acid group is in an

*ortho*-orientation with respect to the hydrazine group, and in this case carbon-3 has a chemical shift of 109 ppm. Comparing nicotinic acid with compounds **1**, **2** and **5**, shows that the hydrazine functionality has an appreciable shielding effect on the carbon-3, whereas the influence of the chlorine on carbon-3 chemical shift appears to be minimal, as can be seen by comparing nicotinic acid with **7**, **8** and **9**, in all of which carbon-3 has a similar chemical shift around 127 ppm. A summary is given on Fig. E2.

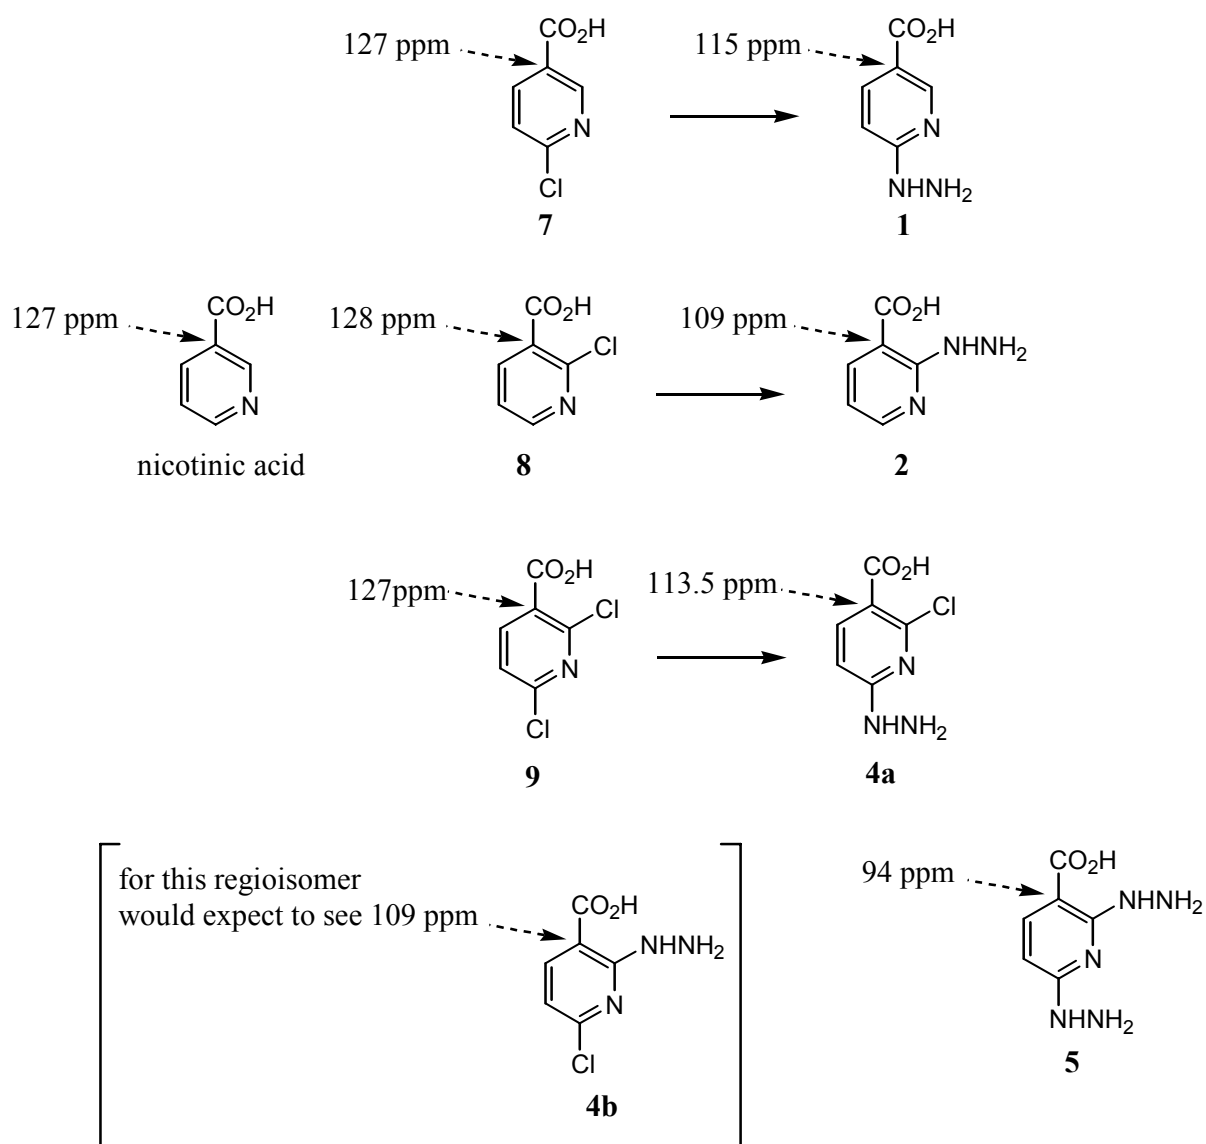

Fig. E2: NMR assignments for **4** and its isomers

### 3. Optimising the conditions for synthesising 5

The experiments we carried out to set up the optimal conditions for making 5 are summarised in Table E1. Mixtures were analysed by LC-MS (method 1).

| Experiment | T (°C) | t (min) | Samples (t (min)) |
|------------|--------|---------|-------------------|
| 1          | 100    | 270     | 270               |
| 2          | 100    | 60      | 0, 20, 40, 60     |
| 3          | 50     | 1020    | 1020              |
| 4          | 60     | 900     | 240, 900          |

Table E1: Experiments to determine the optimal conditions to synthesise 5

#### Experiment 1:

##### Results

NMR data, recorded on a Bruker 400MHz (NMR assignments are shown on Figure E3):

NMR:  $\delta_{\text{H}}$ (400MHz;  $(\text{CD}_3)_2\text{SO}$ ;  $\text{Me}_4\text{Si}$ ): 5.92 (2H, d,  $J=8.4$ , 3-H, 5-H), 5.90 (4H, br, 8-H, 10-H), 6.93 (2H, br, 7-H, 9-H), 7.18 (1H, t,  $J=8.0$ , 4-H).  $\delta_{\text{C}}$ (100MHz;  $(\text{CD}_3)_2\text{SO}$ ;  $\text{Me}_4\text{Si}$ ): 94.20 (C-3, C-5), 138.02 (C-4), 160.81 (C-2, C-6). MS:  $m/z=140.0928$  ( $[\text{M}+\text{H}]^+$ , 100%), 123.0663 ( $[\text{M}-\text{NH}_3+\text{H}]^+$ , 50), 110.0712 ( $[\text{M}-\text{N}_2\text{H}_3+\text{H}]^+$ , 55). MH requires 140.0936.

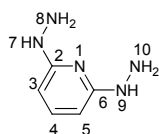

Figure E3: NMR assignments for 2,6-dihydrazinopyridine

##### Discussion

Based on the LC-MS and NMR data we obtained the applied conditions had resulted in a ~100% conversion to 2,6-dihydrazinopyridine (see Scheme E1):

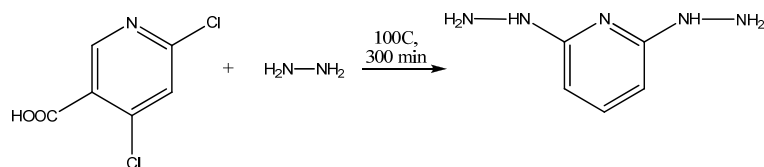

**Scheme E1: The reaction of 9 with hydrazine gives 2,6-dihydrazinopyridine at  $100^\circ\text{C}$**

Note that we were unable to detect **5** in the mixture by mass spectrometry. Thus the above conditions are not applicable for synthesising **5**, but this type of reaction might be of use in organic syntheses regarding the  $\sim 100\%$  conversion to 2,6-dihydrazinopyridine

## Experiment 2

In this experiment, the mixture containing the reactants was heated to  $95\text{--}100^\circ\text{C}$  gradually, with an average speed of  $8^\circ\text{C}/\text{min}$ .  $t=0$  min refers to the time point when  $95^\circ\text{C}$  had been reached.

## Results

LC data are shown in Table E2.

| Peak | RT (min) | Area (%) |      |      |      |
|------|----------|----------|------|------|------|
|      |          | t=0      | t=20 | t=40 | t=60 |
| 1    | 0.3      | 0        | 100  | 100  | 100  |
| 2    | 0.37     | 100      | 72.7 | 0    | 0    |

**Table E2: LC data for Experiment 2**

Note that due to the small difference in retention times compounds reached the mass spectrometer at the same time. MS data are shown below in Table E3.

| Time point | Mass Spectra (m/z in order of relative abundance)               |
|------------|-----------------------------------------------------------------|
| t=0        | 188.0218 (100%), 184.0825 (50%), 190.0189 (33%), 140.0927 (5%)  |
| t=20       | 140.0926 (100%), 184.0824 (73%), 188.0218 (35%), 190.0188 (10%) |
| t=40       | 140.0926 (100%), 184.0825 (25%), 188.0216 (10%), 190.0188 (3%)  |
| t=60       | 140.0926 (100%), 184.0825 (15%), 188.0216 (5%)                  |

**Table E3: Mass spectra obtained at different time points during Experiment 2 (all compounds represented by  $[\text{M}+\text{H}]^+$ )**

## Discussion

Based on the obtained LC-MS data the monosubstitution of **9** to give **4a** and/or **4b** happens quickly; **9** could not be detected even at  $t=0$ . Thus we can conclude that the disubstitution of

**9** to give **5** happens in two steps with **4a** and/or **4b** being intermediates. The putative mechanism for the dihydrazination of **9** (at T=100°C) is shown on Scheme E2:

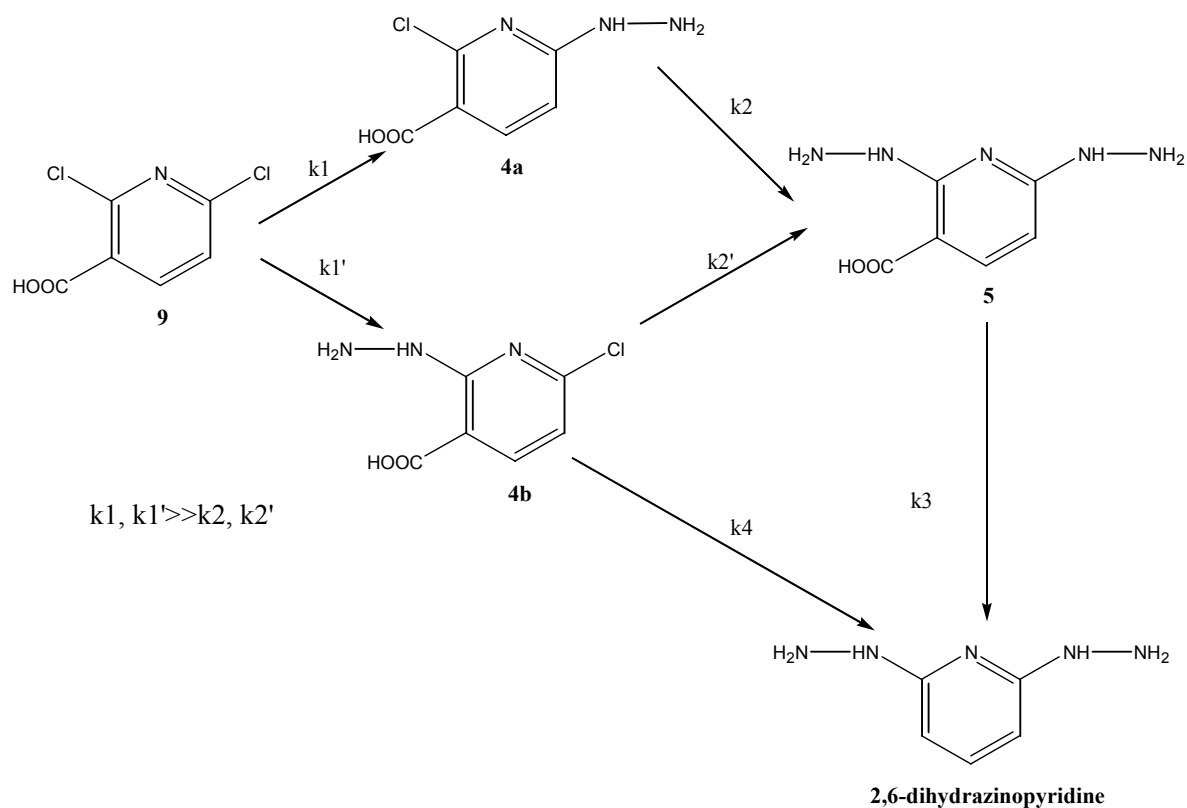

**Scheme E2: Putative mechanism for the dihydrazination and decarboxylation of **9****

Since 2,6-dihydrazinopyridine was almost exclusively detected after 60 minutes the temperature (100°C) was higher than optimal.

### **Experiment 3**

#### **Results**

Results of LC-MS analyses are summarised in Tables E4-5.

| Peak | RT (min) | Area (%) |
|------|----------|----------|
|      |          | t=1020   |
| 1    | 0.36     | 100      |
| 2    | 0.54     | 6.3      |
| 3    | 1.34     | 27.8     |

**Table E4: HPLC data obtained for Experiment 3**

| Time point | LC peak | Mass Spectra (m/z in order of relative abundance)             |
|------------|---------|---------------------------------------------------------------|
| t=1020     | 1-2     | 184.0827 (100%), 140.0926 (15%), 154.0605 (15%)*              |
|            | 3       | 188.0216 (100%), 190.0186 (31%)                               |
|            |         | *: probably fragment ion (N <sub>2</sub> H <sub>3</sub> loss) |

**Table E5: MS data obtained during Experiment 3**

## Discussion

Results of LC-MS analyses suggested the presence of three compounds (peaks). The desired product (5) eluted with 2,6-dihydrazinopyridine in peaks 1-2 and a significant amount of **4a/4b** intermediate was still present (peak 3). Based on the obtained data, the applied conditions were too “mild”, a conversion above 90% would be more appreciated to be able to avoid the need of purification. This experiment confirmed the putative mechanism described in Scheme E2 as **9** could not be detected in the sample (its conversion into **4a/4b** was 100%). The conversion of **4a/4b** to **5** was around 75%, with 2,6-dihydrazinopyridine already being present.

## Experiment 4

### Results

LC-MS data are summarised in Tables E6-7.

| Peak | RT (min) | Area (%) |       |
|------|----------|----------|-------|
|      |          | t=240    | t=900 |
| 1    | 0.35     | 100      | 100   |
| 2    | 0.43-0.5 | 36.1     | 9.8   |
| 3    | 1.2-1.3  | 95.3     | 6.2   |

**Table E6: LC data for Experiment 4**

| Time point | LC Peak | Mass Spectra (m/z in order of relative abundance) |
|------------|---------|---------------------------------------------------|
| t=240      | 1-2     | 184.0825 (100%), 140.0926 (9%)                    |
|            | 3       | 188.0217 (100%), 190.0188 (31%)                   |
| t=900      | 1-2     | 184.0826 (100%), 140.0928 (81%)                   |
|            | 3       | Peak 3 was not present                            |

**Table E7: MS data for Experiment 4**

## Discussion

The above data suggest that the conversion is almost 100% at 60°C in 900 minutes as only **5** and 2,6-dihydrazinopyridine were detected at the end of the experiment. To summarise, the optimal conditions for making **5** are those applied in experiment 4: incubation of **9** in hydrazine hydrate at 60°C for at ~15 hours. Due to having/lacking (**5**/2,6-dihydrazinopyridine) the carboxylic acid moiety **5** and 2,6-dihydrazinopyridine could be separated easily.

### **4. <sup>99</sup>Tc and <sup>99m</sup>Tc labelling of **5** using the tricine-EDDA co-ligand system**

Mass spectra of the above system showed two product ions at  $m/z = 613.0829$  (a) and  $615.0993$  (b), corresponding to  $C_{18}H_{27}N_8O_{10}^{99}Tc$  (a) and  $C_{18}H_{25}N_8O_{10}^{99}Tc$  (b). The formula for ion (a) could either be **5** ( $C_6H_9N_5O_2$ )+2×EDDA ( $C_6H_{12}N_2O_4$ )+<sup>99</sup>Tc-7H-NH or **5** ( $C_6H_9N_5O_2$ ) +EDDA ( $C_6H_{12}N_2O_4$ )+tricine ( $C_6H_{13}NO_5$ )+<sup>99</sup>Tc-7H-H<sub>2</sub>O. The same was found for ion (b), *i.e.* the putative formula of (b) can either stand for **5** ( $C_6H_9N_5O_2$ )+2×EDDA ( $C_6H_{12}N_2O_4$ )+<sup>99</sup>Tc-5H-NH or **5** ( $C_6H_9N_5O_2$ ) +EDDA ( $C_6H_{12}N_2O_4$ )+tricine ( $C_6H_{13}NO_5$ )+<sup>99</sup>Tc-5H-H<sub>2</sub>O. Although a water loss seems to be more probable, the degradation of the hydrazine moiety could also occur (see reference 4 in main article).
